# Supplementary material
Source: publisher site journal article supplement (https://static.cambridge.org/content/id/urn:cambridge.org:id:article:S0090599219001302/resource/name/S0090599219001302supp003.docx)
Supplement: Supplementary file 1 [file S0090599219001302supp003.docx]

Table 1A. Clips containing direct speech of leaders in Russia and Ukraine, by number.

| **Countries/**  **Month** | **09/13** | **10/13** | **11/13** | **12/13** | **01/14** | **02/14** | **03/14** | **04/14** | **05/14** | **06/14** | **07/14** | **08/14** | **Total** |
| --- | --- | --- | --- | --- | --- | --- | --- | --- | --- | --- | --- | --- | --- |
| Russia | 128 | 121 | 135 | 134 | 94 | 113 | 175 | 88 | 120 | 87 | 105 | 83 | **1383** |
| Ukraine | 74 | 86 | 89 | 128 | 37 | 69 | 106 | 87 | 56 | 111 | 109 | 105 | **1057** |

Table 2A. Nationalist rhetoric and issue saliency in the Russian and the Ukrainian media, by number of references.

| **Countries/**  **Month** | **09/13** | **10/13** | **11/13** | **12/13** | **01/14** | **02/14** | **03/14** | **04/14** | **05/14** | **06/14** | **07/14** | **08/14** | **Total** |
| --- | --- | --- | --- | --- | --- | --- | --- | --- | --- | --- | --- | --- | --- |
| Russia | 105 | 69 | 283 | 52 | 79 | 163 | 170 | 171 | 54 | 123 | 77 | 105 | **1503** |
| Ukraine | 29 | 10 | 17 | 42 | 36 | 34 | 18 | 8 | 5 | 34 | 32 | 53 | **318** |

Table 3A. Nationalist rhetoric (associated with “people”) and issue saliency in the Russian and the Ukrainian media, by number of references.

| **Countries/**  **Month** | **09/13** | **10/13** | **11/13** | **12/13** | **01/14** | **02/14** | **03/14** | **04/14** | **05/14** | **06/14** | **07/14** | **08/14** | **Total** |
| --- | --- | --- | --- | --- | --- | --- | --- | --- | --- | --- | --- | --- | --- |
| Russia | 69 | 26 | 27 | 183 | 31 | 29 | 66 | 86 | 90 | 22 | 54 | 41 | **724** |
| Ukraine | 17 | 7 | 12 | 16 | 21 | 23 | 17 | 5 | 5 | 31 | 27 | 39 | **220** |

Table 4A. Nationalist rhetoric (associated with “people”) and issue saliency in the Russian media, by number of references.

| **References/Month** | **09/13** | **10/13** | **11/13** | **12/13** | **01/14** | **02/14** | **03/14** | **04/14** | **05/14** | **06/14** | **07/14** | **08/14** | **Total** |
| --- | --- | --- | --- | --- | --- | --- | --- | --- | --- | --- | --- | --- | --- |
| Political | 40 | 8 | 14 | 116 | 27 | 10 | 55 | 62 | 67 | 17 | 43 | 28 | **487** |
| Economic | 4 | 4 | 4 | 28 | 2 | 2 | 0 | 4 | 0 | 0 | 3 | 0 | **51** |
| Cultural | 27 | 14 | 9 | 42 | 16 | 15 | 14 | 18 | 23 | 6 | 10 | 13 | **207** |
| Total | 71 | 26 | 27 | 186 | 45 | 27 | 69 | 84 | 90 | 23 | 56 | 41 | **745** |

Table 5A. Nationalist rhetoric (associated with “people”) and issue saliency in the Ukrainian media, by number of references.

| **References/Month** | **09/13** | **10/13** | **11/13** | **12/13** | **01/14** | **02/14** | **03/14** | **04/14** | **05/14** | **06/14** | **07/14** | **08/14** | **Total** |
| --- | --- | --- | --- | --- | --- | --- | --- | --- | --- | --- | --- | --- | --- |
| Political | 16 | 4 | 8 | 12 | 15 | 20 | 14 | 4 | 4 | 30 | 27 | 38 | **192** |
| Economic | 1 | 0 | 0 | 1 | 1 | 0 | 0 | 0 | 0 | 0 | 0 | 0 | **3** |
| Cultural | 0 | 3 | 4 | 3 | 5 | 3 | 3 | 1 | 1 | 1 | 0 | 1 | **25** |
| Total | 17 | 7 | 12 | 16 | 21 | 23 | 17 | 5 | 5 | 31 | 27 | 39 | **220** |

Table 6A. Nationalist rhetoric (associated with “nation”) and issue saliency in the Russian and the Ukrainian media, by number of references.

| **Countries/**  **Month** | **09/13** | **10/13** | **11/13** | **12/13** | **01/14** | **02/14** | **03/14** | **04/14** | **05/14** | **06/14** | **07/14** | **08/14** | **Total** |
| --- | --- | --- | --- | --- | --- | --- | --- | --- | --- | --- | --- | --- | --- |
| Russia | 88 | 79 | 42 | 100 | 21 | 50 | 97 | 84 | 81 | 32 | 69 | 36 | **779** |
| Ukraine | 12 | 3 | 5 | 26 | 15 | 11 | 1 | 3 | 0 | 3 | 5 | 14 | **98** |

Table 7A. Nationalist rhetoric (associated with “nation”) and issue saliency in the Russian media, by number of references.

| **References/Month** | **09/13** | **10/13** | **11/13** | **12/13** | **01/14** | **02/14** | **03/14** | **04/14** | **05/14** | **06/14** | **07/14** | **08/14** | **Total** |
| --- | --- | --- | --- | --- | --- | --- | --- | --- | --- | --- | --- | --- | --- |
| Political | 26 | 26 | 10 | 32 | 9 | 6 | 44 | 43 | 36 | 27 | 30 | 12 | **301** |
| Economic | 7 | 9 | 6 | 26 | 1 | 1 | 12 | 12 | 15 | 5 | 4 | 7 | **105** |
| Cultural | 58 | 40 | 22 | 43 | 13 | 43 | 56 | 42 | 38 | 13 | 41 | 17 | **426** |
| Total | 91 | 75 | 38 | 101 | 23 | 50 | 112 | 97 | 89 | 45 | 75 | 36 | **832** |

Table 8A. Nationalist rhetoric (associated with “nation”) and issue saliency in the Ukrainian media, by number of references.

| **References/Month** | **09/13** | **10/13** | **11/13** | **12/13** | **01/14** | **02/14** | **03/14** | **04/14** | **05/14** | **06/14** | **07/14** | **08/14** | **Total** |
| --- | --- | --- | --- | --- | --- | --- | --- | --- | --- | --- | --- | --- | --- |
| Political | 6 | 2 | 3 | 22 | 9 | 6 | 1 | 1 | 0 | 0 | 2 | 8 | 60 |
| Economic | 5 | 0 | 2 | 3 | 2 | 3 | 0 | 0 | 0 | 0 | 0 | 0 | 15 |
| Cultural | 2 | 1 | 1 | 1 | 4 | 2 | 1 | 3 | 0 | 3 | 3 | 10 | 31 |
| Total | 13 | 3 | 6 | 26 | 15 | 11 | 2 | 4 | 0 | 3 | 5 | 18 | 106 |

Table 9A. Nationalist rhetoric (associated with “compatriot”) and issue saliency in the Russian media, by number of references.

| **References/Month** | **09/13** | **10/13** | **11/13** | **12/13** | **01/14** | **02/14** | **03/14** | **04/14** | **05/14** | **06/14** | **07/14** | **08/14** | **Total** |
| --- | --- | --- | --- | --- | --- | --- | --- | --- | --- | --- | --- | --- | --- |
| Political | 1 | 0 | 0 | 3 | 0 | 0 | 0 | 1 | 0 | 0 | 2 | 0 | 7 |
| Economic | 0 | 0 | 0 | 0 | 0 | 0 | 0 | 0 | 0 | 0 | 0 | 0 | 0 |
| Cultural | 0 | 0 | 2 | 0 | 1 | 0 | 2 | 2 | 2 | 0 | 0 | 0 | 9 |
| Total | 1 | 0 | 2 | 3 | 1 | 0 | 2 | 3 | 2 | 0 | 2 | 0 | 16 |

Table 10A. Nationalist rhetoric (associated with “compatriot”) and issue saliency in the Ukrainian media, by number of references.

| **References/Month** | **09/13** | **10/13** | **11/13** | **12/13** | **01/14** | **02/14** | **03/14** | **04/14** | **05/14** | **06/14** | **07/14** | **08/14** | **Total** |
| --- | --- | --- | --- | --- | --- | --- | --- | --- | --- | --- | --- | --- | --- |
| Political | 0 | 0 | 0 | 0 | 0 | 0 | 0 | 0 | 0 | 0 | 0 | 0 | 0 |
| Economic | 0 | 0 | 0 | 0 | 0 | 0 | 0 | 0 | 0 | 0 | 0 | 0 | 0 |
| Cultural | 0 | 0 | 0 | 0 | 0 | 0 | 0 | 0 | 0 | 0 | 0 | 3 | 3 |
| Total | 0 | 0 | 0 | 0 | 0 | 0 | 0 | 0 | 0 | 0 | 0 | 3 | 3 |

Table 11A. Nationalist rhetoric (associated with “Motherland/Fatherland”) and issue saliency in the Russian media, by number of references.

| **References/Month** | **09/13** | **10/13** | **11/13** | **12/13** | **01/14** | **02/14** | **03/14** | **04/14** | **05/14** | **06/14** | **07/14** | **08/14** | **Total** |
| --- | --- | --- | --- | --- | --- | --- | --- | --- | --- | --- | --- | --- | --- |
| Political | 2 | 2 | 1 | 3 | 0 | 2 | 0 | 0 | 0 | 1 | 0 | 0 | 11 |
| Economic | 2 | 0 | 0 | 0 | 0 | 0 | 0 | 0 | 0 | 0 | 0 | 0 | 2 |
| Cultural | 3 | 8 | 2 | 4 | 1 | 2 | 6 | 1 | 13 | 2 | 4 | 2 | 48 |
| Total | 7 | 10 | 3 | 7 | 1 | 4 | 6 | 1 | 13 | 3 | 4 | 2 | 61 |

Table 12A. Nationalist rhetoric (associated with “Motherland/Fatherland”) and issue saliency in the Ukrainian media, by number of references.

| **References/Month** | **09/13** | **10/13** | **11/13** | **12/13** | **01/14** | **02/14** | **03/14** | **04/14** | **05/14** | **06/14** | **07/14** | **08/14** | **Total** |
| --- | --- | --- | --- | --- | --- | --- | --- | --- | --- | --- | --- | --- | --- |
| Political | 0 | 0 | 0 | 0 | 1 | 0 | 0 | 0 | 0 | 0 | 2 | 4 | 7 |
| Economic | 0 | 0 | 0 | 0 | 0 | 0 | 0 | 0 | 0 | 0 | 0 | 0 | 0 |
| Cultural | 0 | 0 | 0 | 0 | 0 | 0 | 0 | 0 | 0 | 0 | 0 | 5 | 5 |
| Total | 0 | 0 | 0 | 0 | 1 | 0 | 0 | 0 | 0 | 0 | 2 | 9 | 12 |

Table 13A. Nationalist rhetoric (associated with “patriot”) and issue saliency in the Russian media, by number of references.

| **References/Month** | **09/13** | **10/13** | **11/13** | **12/13** | **01/14** | **02/14** | **03/14** | **04/14** | **05/14** | **06/14** | **07/14** | **08/14** | **Total** |
| --- | --- | --- | --- | --- | --- | --- | --- | --- | --- | --- | --- | --- | --- |
| Political | 0 | 0 | 0 | 7 | 0 | 0 | 0 | 0 | 0 | 2 | 2 | 0 | 11 |
| Economic | 0 | 0 | 0 | 0 | 0 | 0 | 0 | 0 | 0 | 0 | 0 | 0 | 0 |
| Cultural | 5 | 2 | 9 | 9 | 0 | 1 | 3 | 3 | 2 | 0 | 1 | 8 | 43 |
| Total | 5 | 2 | 9 | 16 | 0 | 1 | 3 | 3 | 2 | 2 | 3 | 8 | 54 |

Table 14A. Nationalist rhetoric (associated with “patriot”) and issue saliency in the Ukrainian media, by number of references.

| **References/Month** | **09/13** | **10/13** | **11/13** | **12/13** | **01/14** | **02/14** | **03/14** | **04/14** | **05/14** | **06/14** | **07/14** | **08/14** | **Total** |
| --- | --- | --- | --- | --- | --- | --- | --- | --- | --- | --- | --- | --- | --- |
| Political | 0 | 0 | 0 | 0 | 0 | 0 | 0 | 0 | 0 | 1 | 3 | 5 | 9 |
| Economic | 0 | 0 | 0 | 0 | 0 | 0 | 0 | 0 | 0 | 0 | 0 | 0 | 0 |
| Cultural | 0 | 0 | 0 | 0 | 0 | 0 | 0 | 0 | 0 | 1 | 0 | 4 | 5 |
| Total | 0 | 0 | 0 | 0 | 0 | 0 | 0 | 0 | 0 | 2 | 3 | 9 | 14 |
